# Supplementary material
Source: Oxford University Press journal article supplement (http://www.oxfordjournals.org/corporate_services/supplement_publication_guide.pdf)
Supplement: Supplementary file 1 [file supplement_publication_guide.pdf]

Oxford Journals Corporate Services

# SUPPLEMENT PUBLICATION GUIDE

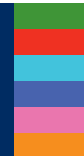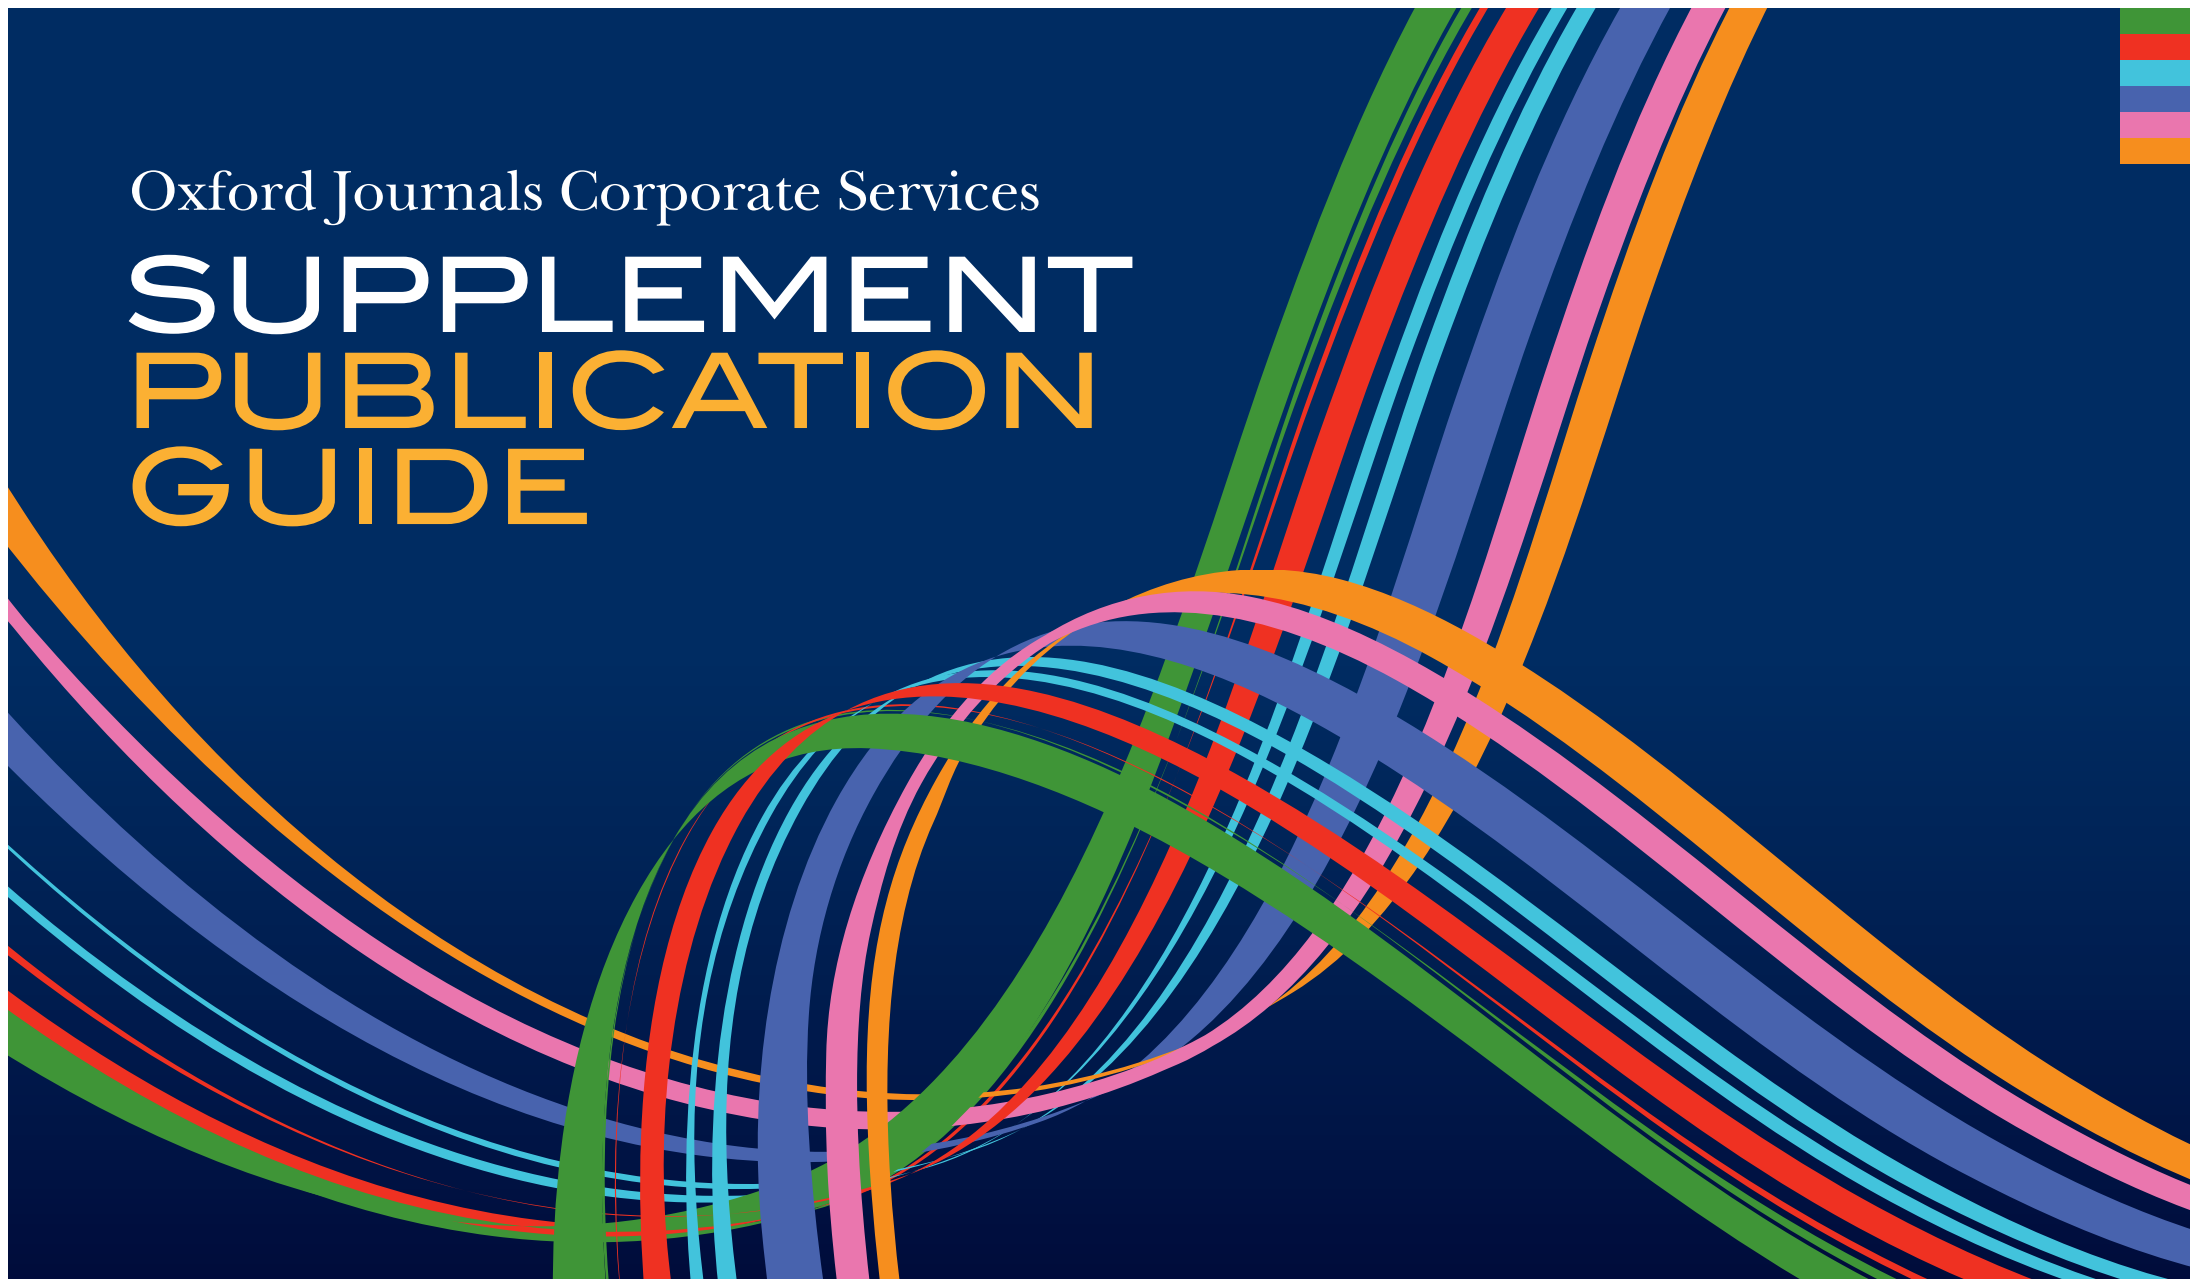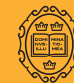

# SUPPLEMENT PUBLICATION GUIDE

A supplement is an excellent tool for getting critical research and clinical findings direct to the professionals that need to see them.

At Oxford Journals, we publish journals in a wide range of fields, and our commitment to the very highest standards of quality means that your supplement will achieve maximum impact. Furthermore, we take care to offer you the support and guidance that you require throughout the publication process.

## Individual attention

We co-ordinate the editorial peer-review and production processes with your needs in mind. In the fast paced world of medical communications we understand your sense of urgency, and our team will work closely with you to ensure that your supplement is published to agreed timelines.

## Maximum impact

We will work with you to guarantee the success of your supplement. If you need extra copies for a conference, just let us know and we will get them there. We can offer inserts, wraps, and advertising in print or online that will raise awareness of your campaign. We also have an optional open access scheme, which means that you can make your research freely available to everyone. If you would like to distribute an important article, we can provide reprints and e-prints quickly to meet your requirements.

## Target leading professionals

By publishing a supplement with Oxford Journals, you can be sure that your research is read by the key opinion leaders worldwide.

### Popular titles include

- *European Heart Journal*
- *Annals of Oncology*
- *The Journal of Antimicrobial Chemotherapy*
- *Rheumatology*
- *EP-Europace*
- *Human Reproduction*

### Our past sponsors include:

Wyeth, Novartis, Amgen, Baxter, GSK, AstraZeneca, Merck, Servier, sanofi-aventis, Merck Serono, Daiichi Sankyo and Eli Lilly to name but a few.

## Commitment to ethical publishing

Be reassured that like you we strive for excellence in research, and integrity and transparency are at the forefront of everything we do – our mission is to bring the highest quality research to the widest possible audience. Publish a supplement with Oxford Journals and know that it has been peer-reviewed to a high standard, and that clear conflict of interest statements and declarations of sponsorship have been submitted.

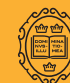

# FAQS

## 1. How much does a supplement cost?

The price of a supplement depends on a number of factors, such as the online circulation of the journal, the print run, the number of pages of the supplement and the impact factor of the journal. For a quote, please phone or email Caroline Bracken, who will be happy to help.

## 2. What do I need to do if I am interested in publishing a supplement?

Sponsors should submit a 1-2 page summary of the proposed contents of the supplement to Caroline Bracken, who will forward it to the Editor of the journal.

## 3. What do I need to include in my supplement summary proposal?

Important points to include are:

- Proposed title
- Subjects covered
- The authors who will be writing the articles
- Proposed guest editor
- Number of Manuscripts
- Sponsor Company
- Any deadlines relevant to the sponsors
- When the manuscripts are likely to be submitted

## 4. How long will it take for the supplement proposal to be assessed?

The approval of the proposal is likely to take up to 7 days.

## 5. How long will the peer review process take?

This varies by journal, please contact Caroline Bracken for details of the journal you are interested in publishing in.

## 6. What is the process for proofreading?

After necessary amendments the Editor will send the manuscripts to OUP for typesetting and proofing. Proofs will subsequently be sent to the authors by OUP; authors will need to proof-read all contributions.

## 7. As the sponsor, what charges am I responsible for?

The sponsors are responsible for all publishing and distribution charges for the supplement. These are payable to Oxford University Press.

The sponsor may also be required to pay editorial charges. This charge is dependent on the editorial office, and would be made for the cost of editorial work. If charged, it will depend on the projected size of the supplement and the work required assessing the submissions. This sum is separate from the publisher's charges and is payable via the editorial office.

## 8. How long will it take for my supplement to be published?

Oxford University Press look to publish a supplement within 8-10 weeks of receipt of the final peer-reviewed copy.

## 9. Who should I contact for further information?

### Caroline Bracken

Supplements Development Manager  
Oxford Journals  
Oxford University Press  
Great Clarendon Street  
Oxford  
OX2 6DP, UK

Tel: +44 (0)1865 353794

Fax: +44 (0)1865 353774

Email: [caroline.bracken@oxfordjournals.org](mailto:caroline.bracken@oxfordjournals.org)

For more information about Journals Corporate Services please visit;  
[www.oxfordjournals.org/corporate\\_services](http://www.oxfordjournals.org/corporate_services)
